# Supplementary material for: Active packaging film based on a green composite: fabrication and performance analysis of pineapple leaf fiber-reinforced PBAT
Source: Royal Society of Chemistry journal article supplement (doi:10.1039/d5ra10078j), 2026-05-08
Supplement: d5ra10078j1.pdf [file d5ra10078j1.pdf]

# Supporting Information

## Active packaging film from a green composite: Pineapple leaf fiber reinforced

### PBAT – fabrication and performance analysis

Yijun Liu <sup>1,2</sup>, Liangyong Zheng <sup>1</sup>, Fanhui Kong <sup>3</sup>, Yongyue Luo <sup>1</sup>, Huangbing Liang <sup>1</sup>, Shaokai Zhang<sup>1</sup>, Xinghao Tu <sup>2\*</sup>, Zhanwu Sheng <sup>1</sup>, Gang Chen<sup>2\*</sup>

1 Hainan Key Laboratory of Storage & Processing of Fruits and Vegetables, Agricultural Products Processing Research Institute, Chinese Academy of Tropical Agricultural Sciences, Zhanjiang 524001, China;

2 Key Laboratory of Tropical Fruit Biology, Ministry of Agriculture & Rural Affairs, South Subtropical Crop Research Institute, Chinese Academy of Tropical Agricultural Science, Zhanjiang, 524091, China;

3 Quality Department, Beijing United-Food Certification Service Co., Ltd., Beijing, 100097, China;

4 State Key Laboratory of Pulp and Paper Engineering, College of Light Industry and Engineering, South China University of Technology, Guangzhou 510640, China;

\* Correspondence: [tuxinghao@catas.cn](mailto:tuxinghao@catas.cn) (Xinghao Tu), [shengzhanwu100@163.com](mailto:shengzhanwu100@163.com) (shengzhanwu100@163.com) and [papercg@scut.edu.cn](mailto:papercg@scut.edu.cn) (Gang Chen)

Yijun Liu and Liangyong Zheng have contributed equally.

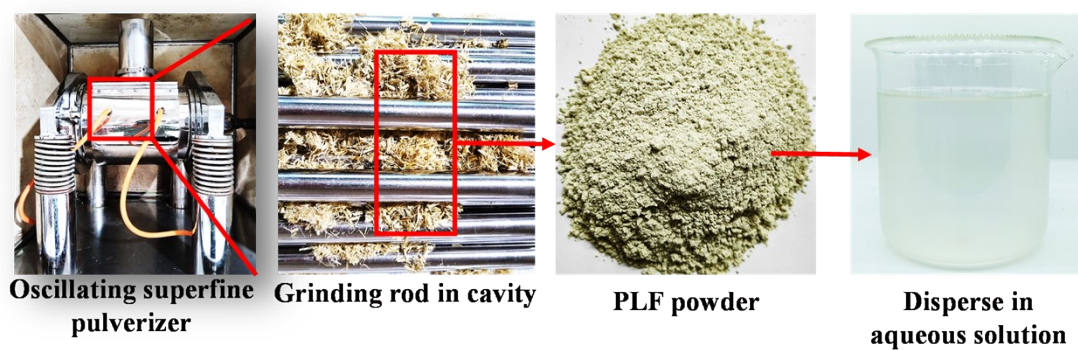

**Figure S1.** Schematic diagram and effect of ultrafine grinding of pineapple leaf fiber
